# Supplementary material for: On the Significance of the ADNT1 Carrier in Arabidopsis thaliana under Waterlogging Conditions
Source: MDPI journal article supplement (doi:10.3390/biom13050731), 2023-04-24
Supplement: s1 [file s1]

# SUPPLEMENTAL MATERIAL

**Table S1.** List of primers used for QuantPrime-qPCR analyses.

| Gene    | ID          | Forward                  | Reverse                  |
|---------|-------------|--------------------------|--------------------------|
| Actin   | AT3G18780.2 | CTTGCACCAAGCAGCATGAA     | CCGATCCAGACACTGTACTTCCTT |
| EF1a    | AT5G60390.1 | TTCGCTGTTAGGGACATGAGG    | GTCGATCATAACGAAAGTCTCA   |
| AAC1    | AT3G08580.1 | CTCCTCACTGGTGACTTACAGGAC | TTGTACTTGACAGCTTCACCAGAC |
| AAC2    | AT5G13490.1 | GGTTCGTTGTGGAGAGGAAACACC | ATGCAAAGTTCAAGGCCTGAGTGG |
| AAC3    | AT4G28390.1 | CGAAGGAATGCTTGCTCTTTGGAG | CGCAAAGTTTAAAGCCTGAGTGG  |
| ADNT1   | AT4G01100.1 | GGGGCTTAGCCAAACTCTTT     | TGAGAAAAGAGGAGCCCAAA     |
| APC1    | AT5G61810.1 | GGAGCCAGGTCCTTTGATACAAC  | TCAGAAACTCTTGGCCCATGC    |
| APC2    | AT5G51050.1 | GAAGACAAAGCGGATATAGGCAC  | TCGTGTAAGTCTGCAACCGAGTT  |
| APC3    | AT5G07320.1 | CGAGATGGGCGTGTTGATTACC   | AATGCCGGCCTTAACAAGAGC    |
| SnRK1.2 | AT3G01090.1 | CAACCGAACCAGAAATGATGGC   | AGGCACGGAACGATTGTCCAG    |
| ADK     | AT2G37250.1 | ATGGAGTTTGACTTACCTGGAGG  | GTGAACTTATGCTGCGACAGAC   |
| APY     | AT3G04080.1 | GGATTCGGATTGAAGCCATCAC   | GCAAATACCCAAAATTGCCTTCCT |
| Pdc1    | AT4G33070.1 | CGACCGTTGGGTTTAATCATGT   | CCATGATAAAGCGTACATGGAAA  |
| PPDK    | AT4G15530.5 | TGAGAAGGGTCATACCGTGAGC   | ACTCCGCCTCTTTCGCAATCTC   |

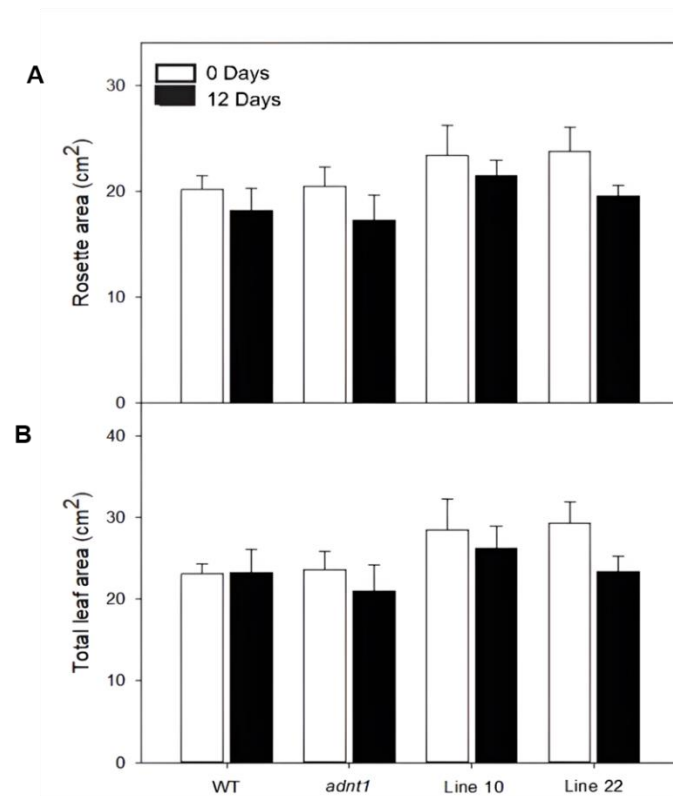

**Figure S1.** Phenotypic characterization of four-week-old Arabidopsis plants with reduced expression of ADNT1 carrier under root waterlogging treatment for 0 and 12 days. Rosette area (**A**) and total leaf area (**B**). Values are means  $\pm$  standard error of six independent plants. Asterisks indicate values that were determined to be significantly different ( $P < 0.05$ ) from the respective WT following the performance of the Student's *t*-test.

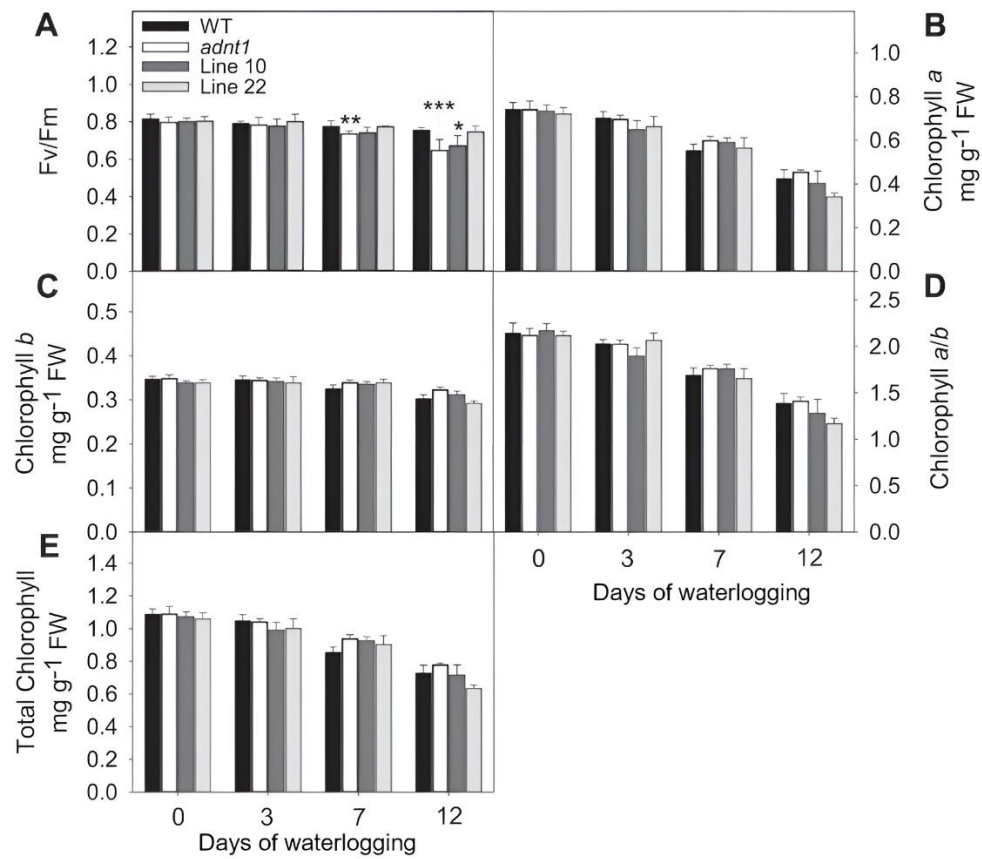

**Figure S2.** Photosynthetic pigments content and maximum quantum yield of PSII electron transport of four-week-old *Arabidopsis* plants with reduced expression of *ADNT1* carrier under root waterlogging treatment for 0, 3, 7, and 12 days.  $F_v/F_m$  (A), Chlorophyll *a* (B), Chlorophyll *b* (C), Chlorophyll *a/b* (D), and Total Chlorophyll (E). Values are means  $\pm$  standard error of six independent samples to pigment analyses and ten independent samples to fluorescence analysis. Asterisks indicate values that were determined to be significantly different ( $P < 0.05$ ) from the respective WT following the performance of Student's *t*-test.

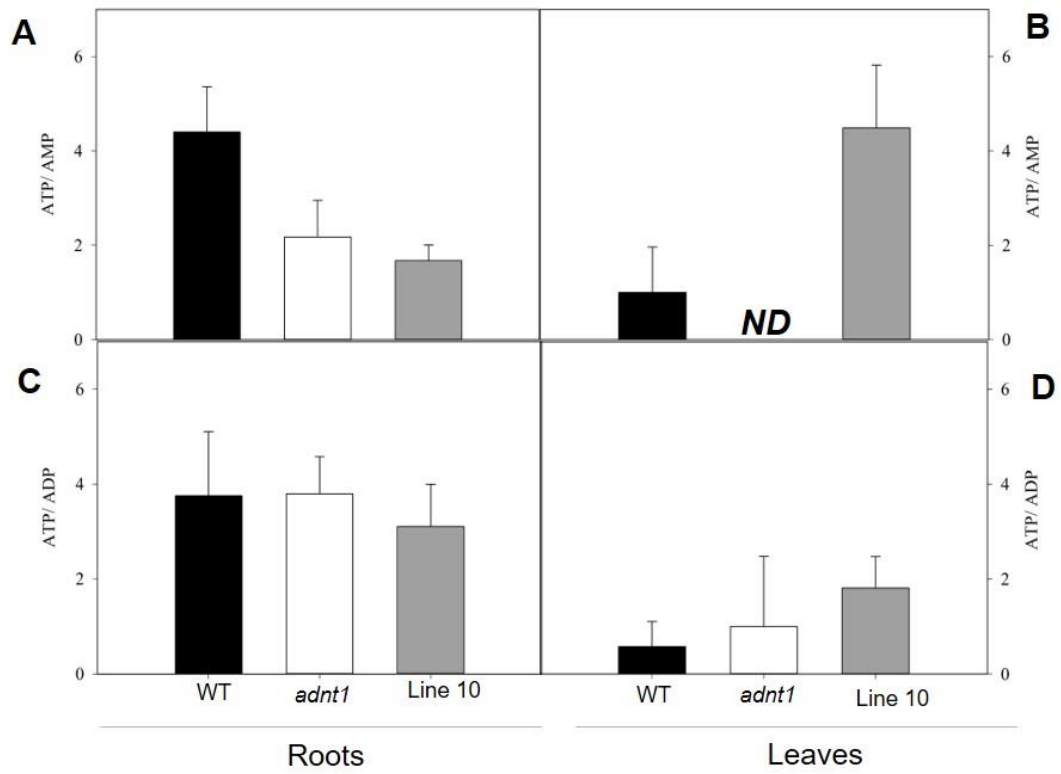

**Figure S3.** ATP/ADP and ATP/AMP Ratio in roots (A and C) and leaves (B and D) of WT, *adnt1* and Line 10 in Arabidopsis. ND (Not detect)- Value below detection limit. Asterisks indicate values that were determined to be significantly different ( $P < 0.05$ ) from the respective WT following the performance of Student's *t*-test.
